# Supplementary material for: Metastatic melanoma patient outcomes since introduction of immune checkpoint inhibitors in England between 2014 and 2018
Source: PubMed Central journal article supplement (PMC7821238; doi:10.1002/ijc.33266), 2020-09-12

# Metastatic melanoma patient outcomes since introduction of immune checkpoint inhibitors in England between 2014 and 2018

Ruth Board<sup>1\*</sup>, Rebecca Smittenaar<sup>2\*</sup>, Sarah Lawton<sup>2</sup>, Hanhua Liu<sup>2</sup>, Bukky Juwa<sup>2</sup>, David Chao<sup>3</sup>, Pippa Corrie<sup>4</sup>

## Table of Contents

Supplementary Table 1: Treatment duration .....1  
 Supplementary Table 2: ICD-10 code names.....1  
 Supplementary Figure 1: Actual monthly prescriptions of immune checkpoint inhibitors...2

### Supplementary Table 1: Treatment durations (medians and ranges)

| Immunotherapy regimen | No. patients | Median treatment duration | Min | Max |
|-----------------------|--------------|---------------------------|-----|-----|
| Ipilimumab            | 724          | 68 [95% CI: 62, 76]       | 3   | 147 |
| Ipnivo                | 372          | 63 [95% CI: 62, 71]       | 7   | 440 |
| Nivolumab*            | 52           | 364                       | 27  | 657 |
| Pembrolizumab         | 1,174        | 192 [95% CI: 172, 216]    | 5   | 943 |

\* Confidence intervals could not be produced as there were an insufficient number of events.

### Supplementary Table 2: ICD-10 code names

| Toxicity Grouping | ICD codes | Code names                                                  |
|-------------------|-----------|-------------------------------------------------------------|
| Colitis           | K521      | Toxic gastro-enteritis and colitis                          |
|                   | K529      | Non-infective gastro-enteritis and colitis, unspecified     |
|                   | A099      | Gastroenteritis and colitis of unspecified origin           |
| Endocrinopathy    | E059      | Thyrotoxicosis, unspecified                                 |
|                   | E222      | Syndrome of inappropriate secretion of antidiuretic hormone |
|                   | E230      | Hypopituitarism                                             |
|                   | E231      | Drug-induced hypopituitarism                                |
|                   | E236      | Other disorders of pituitary gland                          |
|                   | E871      | Hypo-osmolality and hyponatraemia                           |

|                                   |      |                                                              |
|-----------------------------------|------|--------------------------------------------------------------|
| Hepatitis                         | K711 | Toxic liver disease with hepatic necrosis                    |
|                                   | K712 | Toxic liver disease with acute hepatitis                     |
|                                   | K716 | Toxic liver disease with hepatitis, not elsewhere classified |
|                                   | K718 | Toxic liver disease with other disorders of liver            |
|                                   | K754 | Autoimmune hepatitis                                         |
|                                   | K759 | Inflammatory liver disease, unspecified                      |
| Nausea, vomiting and constipation | R11X | Nausea and vomiting                                          |
|                                   | K590 | Constipation                                                 |

**Supplementary Figure 1:** Actual monthly prescriptions of (a) ipilimumab, (b) pembrolizumab, (c) nivolumab and (d) ipinivo recorded in the SACT database between April 2014 and 2018.

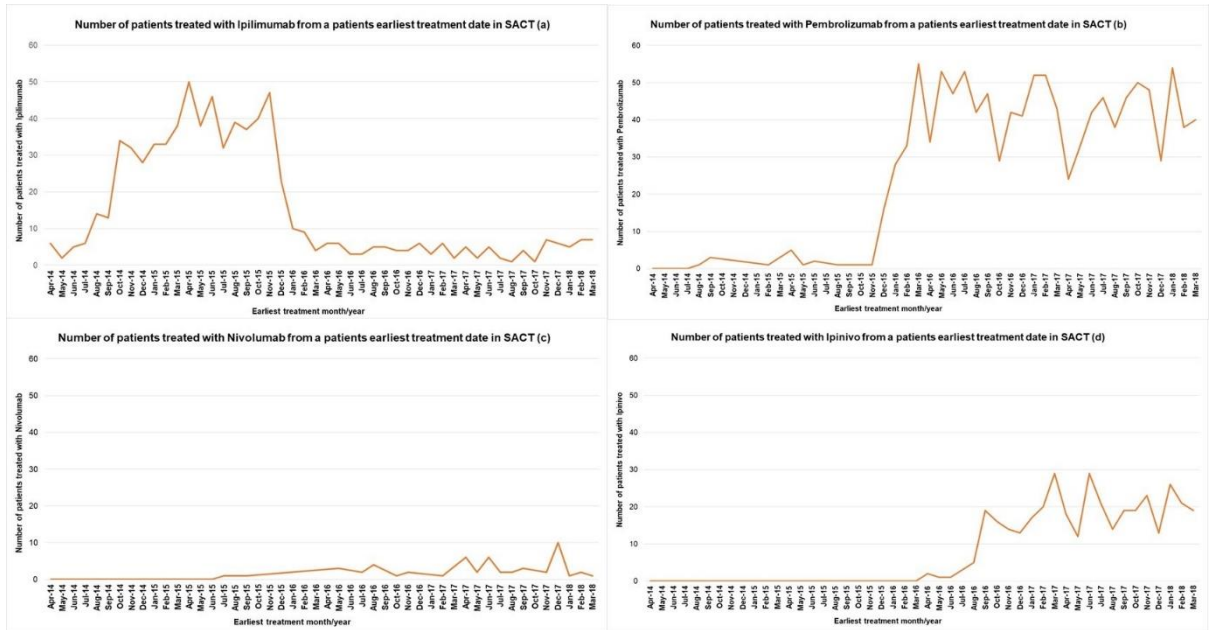

Supplement: IJC-148-868-s001.pdf [file IJC-148-868-s001.pdf]
